# Supplementary material for: Highly reversible capacity at the surface of a lithium-rich manganese oxide: a model study using an epitaxial film system
Source: Royal Society of Chemistry journal article supplement (doi:10.1039/c4cc07758j), 2014-12-04
Supplement: c4cc07758j1.pdf [file c4cc07758j1.pdf]

## Electronic Supplementary Information

### Highly reversible capacity at the surface region of a lithium-rich manganese oxide: A model study using an epitaxial film system

Sou Taminato,<sup>a</sup> Masaaki Hirayama,<sup>a,\*</sup> Kota Suzuki,<sup>a</sup> Norifumi L. Yamada,<sup>b</sup> Masao Yonemura<sup>b</sup>, Jin-Young Son,<sup>c</sup> and Ryoji Kanno<sup>a</sup>

<sup>a</sup> Department of Electronic Chemistry, Interdisciplinary Graduate School of Science and Engineering, Tokyo Institute of Technology, 4259 Nagatsuta, Midori-ku, Yokohama 226-8502, Japan

<sup>b</sup> Institute of Materials Structure Science, High Energy Accelerator Research Organization (KEK), 203-1 Shirakata, Tokai, Ibaraki 319-1106, Japan

<sup>c</sup> Japan Synchrotron Radiation Research Institute (JASRI), 1-1-1 Koto, Sayo, Hyogo 679-5198, Japan

\*Corresponding author, TEL: +81-45-924-5403, Fax: +81-45-924-5403, e-mail: hitrayama@echem.titech.ac.jp

#### S1. In-plane XRD patterns of an epitaxial Li<sub>2</sub>MnO<sub>3</sub> film

Fig. S1 shows the 020 and 060 diffraction peaks are observed along the in-plane [1-10] direction at 20.7° and 65.3°, respectively. The 020 peak is attributed to a superlattice structure with honeycomb Li/Mn ordering in the transition metal layer, confirming the formation of a lithium-rich layered structure. Fig. S2 shows the rocking curve of the 020 reflection indicates six-fold symmetry at intervals of 60°. Although the 020 reflection should have two-fold symmetry, the six-fold symmetry demonstrates that the Li<sub>2</sub>MnO<sub>3</sub>(001) film was composed of 60°-rotated domains:

$\text{Li}_2\text{MnO}_3[010]//\text{SrTiO}_3[110]$ ,  $\text{Li}_2\text{MnO}_3[010]//\text{SrTiO}_3[011]$  and  $\text{Li}_2\text{MnO}_3[010]//\text{SrTiO}_3[101]$ .

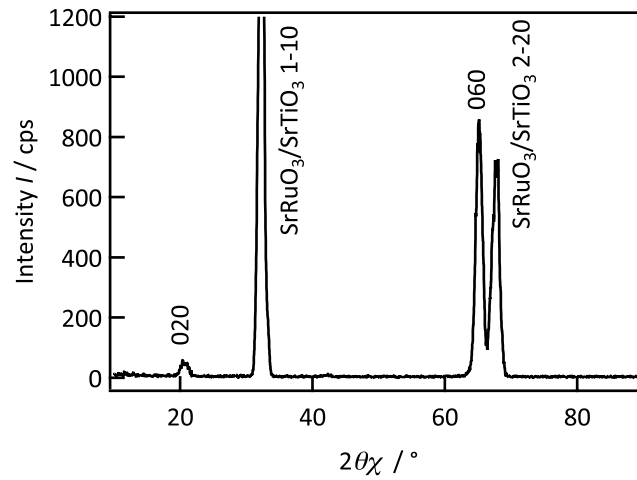

Fig. S1 In-plane XRD pattern for a  $\text{Li}_2\text{MnO}_3$  film on  $\text{SrRuO}_3(111)/\text{Nb}:\text{SrTiO}_3(111)$ .

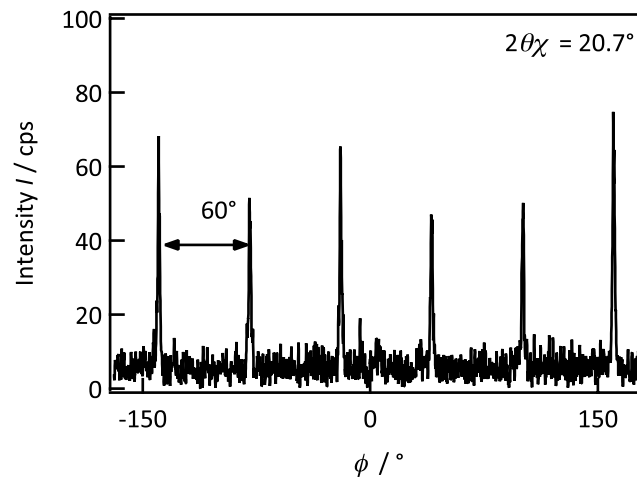

Fig. S2 In-plane phi scan XRD pattern for a  $\text{Li}_2\text{MnO}_3$  film on  $\text{SrRuO}_3(111)/\text{Nb}:\text{SrTiO}_3(111)$ .

## S2. Comparison of XRD and XANES results among $\text{Li}_2\text{MnO}_3$ films with different thicknesses

Fig. S3 shows XRD patterns of 12.6, 29.8, and 45.1 nm-thick  $\text{Li}_2\text{MnO}_3(001)$  films synthesized under the same PLD conditions except for the deposition time.

Whereas the intensities of the  $00l$  and  $0k0$  diffraction peaks increased with the film thickness, no significant changes in cell parameters and intensity ratios of  $00l$  to  $0k0$  peaks were observed in the thickness range. These results indicate that those films had a similar crystal structure and composition. Fig. S3 shows Mn-K edge XANES spectra of 12.6 and 29.8 nm-thick  $\text{Li}_2\text{MnO}_3(001)$  films. The similar spectra reveal the same coordination environment of Mn ions in both films, which is consistent with the XRD results. Hence, we conclude that the  $\text{Li}_2\text{MnO}_3(001)$  films with different thicknesses had a similar structure and lithium and oxygen deficiency.

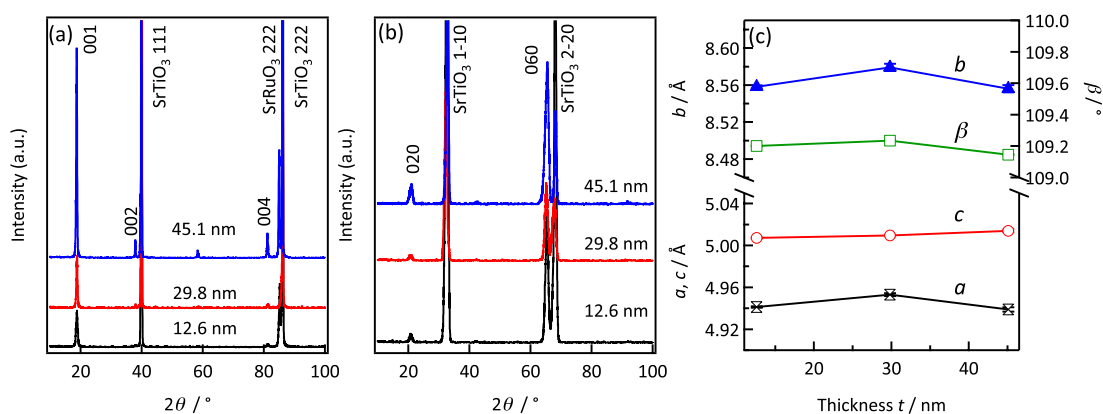

Fig. S3 (a) Out-of-plane and (b) in-plane XRD patterns and (c) cell parameters of 12.6, 29.8, and 45.1 nm-thick  $\text{Li}_2\text{MnO}_3(001)$  films.

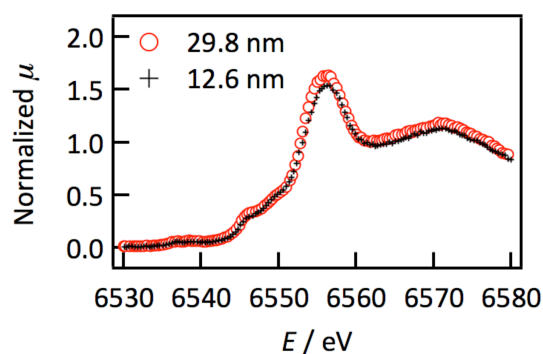

Fig. S4 XANES spectra of Mn-K edge of 12.6 and 29.8 nm-thick  $\text{Li}_2\text{MnO}_3(001)$  films.
